# Supplementary material for: Probabilistic Hydrological Estimation of LandSlides (PHELS): global ensemble landslide hazard modelling
Source: Copernicus journal article supplement (doi:10.5194/egusphere-2023-869), 2023-05-12
Supplement: Supplementary file [file egusphere-2023-869-AC1-supplement.pdf]

The authors thank the reviewers for their constructive comments. The comments are shown in regular fonts (we added numbers), ***our responses are in bold italic, blue fonts.*** *Changes made in the manuscript are printed in italic, underlined, blue fonts.* ***Our line references refer to the updated manuscript with track-changes.***

Reviewer #1: Mirus, Ben

This manuscript concisely presents a new approach to probabilistic landslide hazard modeling, which leverages a susceptibility model published previously in NHSS (Felsberg et al., 2022) with ensemble modeling to evaluate the suitability of a few alternative predictor variables for hydrologically triggered landslides. This PHELS model is applied at the global scale with coarse spatial and temporal resolution. Of the hydrologic predictors considered, rainfall with root zone soil moisture performed better than either of those variables alone and slightly better than an antecedent rainfall index used in the LHASA model (Stanley et al., *Frontiers*, 2021). When using a sparse global landslide catalogue, the output compares favorably to this existing model and the spatial and temporal variability in performance is shown, which reveals that uncertainty is lower during wetter seasons than drier ones. Furthermore, the probabilistic analysis reveals that very high and very low hazard predictions are well constrained, whereas the combinations of moderate susceptibility and moderate triggering conditions exhibit far greater uncertainties in landslide hazard predictions.

Overall, the topic is of considerable interest to NHSS readers, and this is a nice piece of work that presents several notable contributions, which ultimately warrants publication. Specifically, the approach for incorporating uncertainty in spatial and temporal probability of landsliding is novel and broadly applicable to hazard modeling, the evaluation of multiple predictor variables for hydrologic triggering is interesting, and the seasonal and spatial analysis as well as comparison of results to other global-scale analyses is useful. While these results are not particularly surprising and follow somewhat logically from the methods and input data, the work is technically sound and a useful reference. Methods and data are clearly described, such that results should be readily reproducible and the methods applied successfully with other data. The primary areas for improvement are largely editorial and include adding a more involved interpretation and context for the results, as well as some minor details in the presentation and figures. Therefore, the paper should be published after undergoing some minor revisions to address the following general and specific comments.

***We thank the reviewer for the positive feedback and encouraging words.***

1) In general, the authors should make a little more effort to discuss what is interesting and useful about the results in the context of other studies. Readers should be confronted with both the advantages of the approach and its application, as well as its limitations, so that the utility and value of the resulting PHELS model is more apparent. For example, the framework for

uncertainty assessment provides a robust approach to integrate forecast uncertainty that would be an important methodological advance for regional-scale landslide warning, but at the same time the global application seems of limited value for practical implementation locally and the reasonably strong performance is likely linked to the coarse spatial and temporal resolution and the decision to exclude a 6-day window for selecting non-triggering rainfall conditions. At the same time, the finding that the combination of daily rainfall with root zone soil moisture is more effective than seven-day rainfall index used in the LHASA model is consistent with recent advances in local landslide warning that leverage in-situ monitoring in favor of antecedent rainfall for reducing failed and false alarms, so it is useful to know that this potentially applies globally. Lastly, the revised version should include some discussion of why the model at such coarse resolution is useful, how that affects performance, and the limits of that utility.

***We extended the Discussion to provide more insights into advantages, limitations and applicability of the PHELs model and its setup, which was also suggested by reviewer #2, Clàudia Abancó. The new paragraphs are therefore a combination of recommendations:***

*This known incompleteness of the inventory not only influences the performance evaluation, but also adds to the uncertainty of the model fitting process (i.e. Equations 5-6). While the goodness of fit can be quantified (see Table 1) and theoretically propagated, it is still relative to the available inventory. Quantification of inventory-induced uncertainty requires very detailed or synthetic landslide inventories and has been subject of many studies for LSS (Steger et al., 2017; Lin et al., 2021) but less so for hazard assessment. PHELs does not account for such inventory-induced uncertainty, but it does include the uncertainties and within-grid-cell heterogeneity of input variables by using an ensemble approach. The latter allows to easily account for, e.g., the uncertainty in rainfall, which is directly available from ensemble weather prediction systems. Or to account for modeled soil moisture uncertainties, which can be obtained from ensemble land surface model simulations that are usually optimized to match the variations in observations. Nevertheless, models are always a simplification of real world conditions and the downscaling of coarse-scale model estimates to fine scale applications remains a challenge.*

*PHELs provides reliable insights into spatio-temporal patterns of landslide hazard but has limitations in the context of actual early warning systems. These usually require higher spatial resolution and temporal accuracy. The coarse spatial resolution would hence call for downscaling methods to obtain within grid-box distributions. And although we use the evaluation approach LSE3 because of time shifts and possible observation errors, the fact that peaks of hazard are often simulated within a 3-day window around a recorded LSE may also indicate a low temporal accuracy, which might be mainly associated with the coarse-scale global re-analysis input of precipitation.. For early warning systems the question moreover remains how to interpret or use the hazard uncertainty. Low enough uncertainty could be used as a secondary condition before warnings are issued to the public or the uncertainty could be directly communicated as is. However, ensemble measures such as the maximum predicted hazard (“worst case scenario”) or the 90<sup>th</sup> quantile of ensemble hazard prediction might be easier to understand. While this study used PHELs with specific spatio-temporal resolution and input data, its adjustable, modular character makes PHELs a general framework for hazard*

estimation that can be tailored to specific purposes. If adequate landslide and hydrological data are available, it would therefore be possible to create a PHELS setup that is more suitable for local to regional landslide early warning systems. (Lines 375-397)

In terms of presentation, the writing is clear and most of the figures are great. To address these and the general comments above, I have included the following specific comments and suggestions by line number:

2) L18. Specify: "... a two-step approach that separately evaluates where and when landsliding will occur." Also, why are you referencing the first approach (Stanley et al papers) and not a long list of others using the two-step, particularly since that is your approach here?

***We included your suggested extension in the manuscript. We had not included references for the two-step process here, since the following paragraphs elaborate this two-step process in more detail and provide references. However, to avoid confusion about this, we included the references in question already here. [...] or in a two-step process that separately evaluates where and when landsliding is likely to occur (Kirschbaum and Stanley, 2018; Monsieus et al., 2019a, b; Bordoni et al., 2020). (Lines 18-19)***

3) L23. It is misleading to imply that LHASA is specifically for landslide early warning since the rainfall data includes some latency and can at best be considered a "now-cast" of potential landslide conditions (i.e., see title of Stanley et al., 2021). At this point assessments that combine when and where landslides are likely cannot be used in a predictive mode for warning and their value for real-time hazard assessments is unclear. Furthermore, these are not typically ideal hazard assessments, in that they do not explicitly account for the magnitude and mobility of the potential landsliding, which is a significant consideration.

***This is a valid point. We added a separate reference for the use of susceptibility maps in early warning systems and give now-casting as another use-case to introduce the mention of LHASA in the next sentence. Others are specifically developed to be used in a landslide early warning system (Guzzetti et al., 2020) or 'now-casting' approach: [...] (Lines 24-25)***

4) L25. Maybe it's worth mentioning that in addition to relying on a single threshold for landslide initiation (e.g., the 95%-ile of the ARI7 predictor at each grid cell), these also employ some susceptibility threshold that also amounts to a simple binary yes/no for landslide occurrence (though different thresholds of moderate or high have been used for different applications of the model). The value of your study is combining both within a probabilistic framework for both potential and initiation, so highlighting that here is worthwhile even if it's stated elsewhere.

***This is a good point. We added the keywords "categorized" and "thresholds" to the sentence to underline this difference. [...]: the global, categorized LSS assessment by Stanley and Kirschbaum (2017), for instance, has been developed to allow severity thresholds within the first version of the Landslide Hazard Assessment for Situational Awareness (LHASA) model (Kirschbaum and Stanley, 2018). (Lines 25-28)***

5) L27. Whiteley et al (2019) is a very nice review of geophysical methods for landslide monitoring, but it's not exactly an appropriate reference for physically based modeling of landslide initiation potential. If I understand correctly, there are a lot of more appropriate examples (TRIGRS, Baum et al., *JGR-ES*, 2010; SCOOPS3D, Brien and Reid, *Rev. Eng. Geol*, 2008; SHALSTAB, Montgomery and Dietrich, *WRR*, 1994; etc., or review of this in the textbook Lu and Godt, 2013).

***Thank you for catching this inconsistency! We added the review by Lu and Godt, as well as the example of TRIGRS and removed the reference to Whiteley et al.: The temporal probability can either be calculated explicitly by physical models that compute the shear strength and stress in slopes (Lu and Godt, 2013; Baum et al., 2010) [...] (Lines 29-30)***

6) L45. Ok, here you define your limits of hazard modeling, but potentially should acknowledge that an ideal hazard assessment also includes the magnitude and mobility to determine where hazards are present, but in my view that's acceptable since at such coarse resolution that's not really as relevant.

***Indeed, the question of what hazard modelling should comprise is scale dependent. We added a subclause referring to this: We comprise all of the above-mentioned approaches under the term 'hazard modelling' , while being aware that at smaller scales the size and mobility of a landslide may also be an essential part of hazard prediction. (Lines 49-51)***

7) L60. Here the use of "magnitude" is misleading. Be more specific and careful to clarify that you are evaluating the degree to which the spatiotemporal potential for landsliding is related to the uncertainty. There are lots of different ways you could consider "magnitude" of the event, from the size and velocity of the landslides to the number or extent of landslides or even their severity.

***Here, we simply intended to refer to the magnitude of the hazard value, not the magnitude of the landslide event. Thanks for pointing out that the phrasing can be misleading. We added "value" to avoid any misunderstanding: 2) Is the estimated uncertainty related to the magnitude of the simulated hazard value? (Line 66)***

8) L71. Isn't there also a bias towards landslides in areas where they have an impact (i.e., roads, developed areas), as well as for landslide types that have a more notable impact (e.g., debris flows and shallow mass movements that affect infrastructure)?

***True. We extended the sentence to reflect on this bias from the data collection method as well: Note that the known economic and English-language bias, as well as the fact that media reports tend to focus on inhabited areas and landslides with notable impact on infrastructure, will affect the completeness of these inventories and reduce the reliability of their 'absence reporting'. (Lines 75-78)***

***We also edited the caption of Figure 1 to make clear that these are only the reported landslides.***

9) L100. This seems to imply that most landslides (in the inventory?) fail at <1m depth. Is that supported by analysis of the GLC? Again, see comment earlier about dataset bias: is the GLC indeed mostly shallow landslides?

*The GLC uses a system of categorical size descriptors (small, medium, large, very large, catastrophic) depending on the estimated volume, i.e. it is difficult to retrieve information on the depth of the shear plane itself. Most landslides from the GLC are reported to be of "medium" size (>10m<sup>3</sup>, <1000m<sup>3</sup>). Essentially, what we intend to say is that rzmc is more suitable than the surface water content or the total water storage by themselves because 1m depth should be closer to the shear plane. We will rephrase the sentence as follows: The rzmc contains information on both surface water content and groundwater and should therefore be indicative not only of water content at landslide shear planes <1m, which we consider a typical depth, but also for more shallow or deep-seated landslides. (Lines 106-109)*

10) L191. This is a major assumption that warrants further discussion. Even if others have used this +/- 3days method before, I'm not convinced it is appropriate since you don't need a model to predict landslides when it's not raining hard. It seems to undermine the value of the model predictions by weighting the non-predictions to times when it's not really raining. A landslide hazard assessment tool really needs to be able to distinguish between triggering and non-triggering conditions *when it's actually raining hard* which your uncertainty assessments show it struggles most with in all but the most extremely high and low hazard levels.

*This is a very valid point and actually already describes the reason why rzmc by itself is not the best of our tested predictor variables. For local to regional hazard models with very reliable landslide data and meteorological information, we agree, focus should lie on the exactness of the hazard prediction within a multi-day window. At the global scale and coarse spatial resolution, however, we are dealing with uncertainties in a) rainfall data, b) landslide timing from media reports, c) time zone shifts, i.e. PHELS is destined to capture general spatio-temporal patterns rather than concrete landslide events. We use reported landslide events as indicators for such patterns. Nevertheless, we included a sentence in the discussion reflecting on the limitations of the +/- 3days method (see second paragraph in reply to comment 1)*

11) Figure 4. The greater Seattle Area experienced widespread landsliding in mid-late January 2016, including several mentioned explicitly in our paper (Mirus et al., *Landslides*, 2018) and I think also elsewhere (see Luna and Korup, *GRL*, 2022). This is an interesting opportunity to show an example where the inventory is not just incomplete in space, but also in time and how that influences results.

Separately, this figure does a nice job of visualizing why a combination of RZSM and daily rainfall is a valuable combination.

*Thank you for reminding us of the dates of the landslides in your publication from 2018. We included this example in the discussion: For both models, FPR might however be erroneously high due to known underreporting in the GLC, even within well reported areas. Figure 4 for example misses mid-late January events of 2016 in the Seattle area that were reported by Mirus et al. (2018). (Lines 372-374)*

*Thanks also for pointing us to the publication by Luna and Korup, it is an interesting read and concept! We include the concept of seasonal or monthly landslide modelling in the discussion and conclusion as well: Other datasets could be used [...], the predictors could be preprocessed differently, e.g. into daily or 3-hourly rainfall maximum (Patton et al.,*

2023), monthly rainfall (Luna and Korup, 2022), antecedent soil moisture (Mirus et al., 2018), soil moisture changes (Wicki et al., 2020), or short- and long-term anomaly values. (Lines 305-309)

The approach can also be promising at smaller scales with local (in-situ) data or for seasonal modelling [...]. (Lines 416-417)

12) L238. This is more interesting in that it shows that the cumulative rainfall variables are not necessarily the best predictors for landslide triggering, instead there are likely some sub-daily rainfall characteristics (e.g., three-hour rainfall intensity, see Patton et al., *NHESS*, 2023). In contrast, the predictors that integrate the hydrologic variable, RZSM, may better capture those, albeit not explicitly. Still, relying on a +/- 3-day window to obtain great model performance really undermines some of the potential utility of such a tool. Emergency planners and the general public don't really want to be on high alert ready to take action for 6 days.

*It is true that PHELS was not developed with the needs of emergency planners in mind, and that our performance analysis lacks this viewpoint. In contrast to in-situ observations of rainfall close to the landslide location in question, precipitation data from a reanalysis model does come with larger possible error, as does our global approach. This was the reasoning behind the +/-3 days. We now discuss the limitation for early warning (see reply to comment 1 and 10)*

*Thanks also for pointing us to Annette Patton's recent preprint. We included this in our discussion of possible other predictor variables (see reply to comment 11)*

13) L265. Can the discussion include any conjecture on why these spatial variability in uncertainty? Is it all due to the triggering not capturing the type of landslides, is it greater combined uncertainty in both the susceptibility and initiation? Is it data limitations?

*From a pure modeling point of view, it is the uncertainty of the input variables and their combination. Situations where soil moisture and rainfall and LSS are high can easily be distinguished as highly hazardous, and hazard ensemble members deviate less from one another. The same goes for the opposite conditions as well. In addition, the ensembles of the input parameters (soil moisture, LSS) are generally smaller for more extreme magnitudes due to their boundedness. We added a paragraph discussing the concrete example of 15 September 2015 and also connect the observations to insights from Figure 10: This connection of  $H_{ens}$  uncertainty with the uncertainty of the input variables generates a spatial pattern that is closely following the input patterns. As examples for low  $H_{ens}$  uncertainty on 15 September 2015 we found central USA, the Amazon and the Congo basin (see Figure 8). These regions have low LSS and they exhibit dry conditions at this time (low  $rzmc$  and low or no rainfall) with small connected uncertainty: consequently, low  $\bar{H}$  values and low  $H_{ens}$  uncertainties are found. Since these regions have nearly no observed LSE (see Figure 1), sampled grid cells would probably be true negatives (TN). For the complete study period TN also showed lowest  $\bar{H}$  and  $H_{ens}$  uncertainty (see Figure 10b). As examples for high  $H_{ens}$  uncertainty on 15 September 2015 we found Central America and China. Both record a large number of observed LSE and high LSS with low uncertainty. However,  $rzmc$  is intermediately high with increased uncertainty and rainfall is high with large uncertainty, resulting in  $H_{ens}$*

uncertainty also being high. Sampled grid cells would probably be positive predictions (TP, FP), which for the complete study period also showed highest  $\bar{H}$  and  $H_{ens}$  uncertainty (see Figure 10b). (Lines 328-337)

14) Figure 10b. This figure is visually very challenging and not particularly accessible for individuals with red-green color blindness. Can you further reinforce this with a better color scheme and show TN, FP, FN, and FP with distribution curves of H and standard deviation on the x and y axes, respectively?

***Thank you for this suggestion that indeed makes the plot more understandable! We changed the color scheme and added distribution curves of the groups along the x and y axes.***

### b) sampled LSE and noLSE between 2007 and 2020

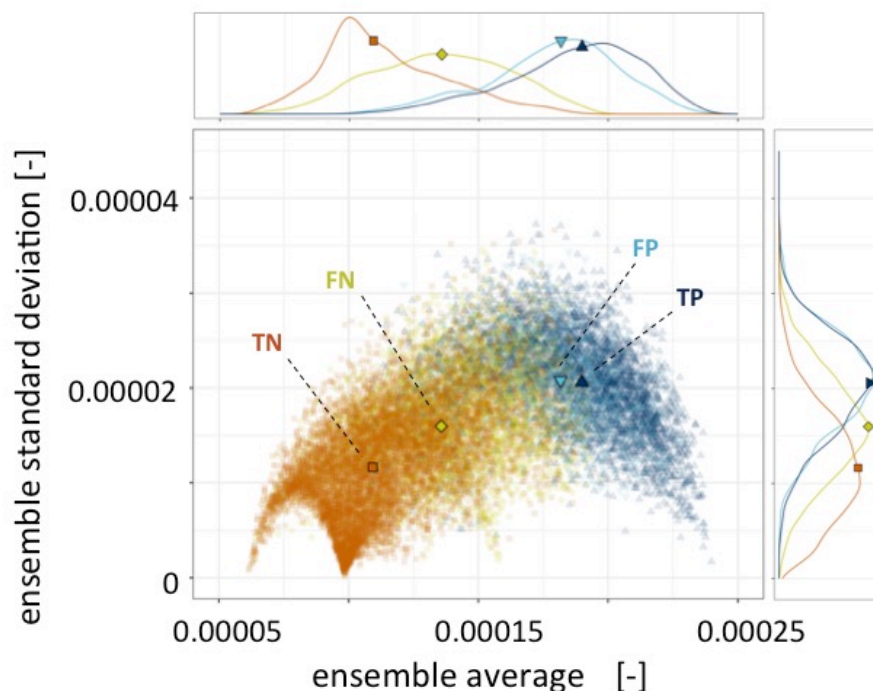

***The caption of the Figure was updated accordingly: [...] The marginal distributions of the ensemble average and standard deviation are shown on the top and side panels. Median values are indicated by the larger symbols on top of the scatter cloud and on the marginal distributions. [...]***

***And we describe the different distributions in the Results section: Symbols and color indicate whether LSE and noLSE were correctly captured (true positive - TP; true negative - TN) or not (false positive - FP; false negative - FN), again using the temporal 90<sup>th</sup> percentile of  $\bar{H}$  as a threshold. The distributions of  $\bar{H}$  for the positives are significantly different from that of the TN and they have a peaked distribution. Whereas the distribution for the FN is wider and largely overlaps with the distribution for the positives and the TN. While median uncertainty for FN, i.e. missed alarms is larger than that for TN, median uncertainty for FP, i.e. false alarms, is nearly identical to that of TP. (Lines 278-283)***

15) L285. Is this accounting for errors the +/- 3 day window? Again, this undermines the practical value of this type of model if it can only perform well at capturing a landslide event within a 6-day window, particularly given the coarse spatial resolution.

***We added a paragraph in the Discussion on the topic of the +/-3 day window (see reply to comment 10)***

16) L330. Yes, we also found replacing antecedent rainfall with antecedent soil moisture decreased failed and false alarms (Mirus et al., *Landslides*, 2018).

***Thanks for reminding us that you also found this in your study. We added the reference: The reduction in false alarms was also reported by Ponziani et al. (2012); Mirus et al. (2018); Segoni et al. (2018a); Stanley et al. (2021) . (Lines 353-354)***

***And also in the introduction: [...] the inclusion of soil water content has been found to prevent false alarms, independent of the data source (Ponziani et al. 2012; Mirus et al. 2018; Segoni et al. 2018a; Stanley et al. 2021). (Lines 43-45)***

17) L331. I don't quite follow this logic. ARI7 uses a weighted averaging daily rainfall over 7 days... how does that capture sub-daily bursts in rainfall intensity that may trigger landslides?

***We understand the confusion. What we intended to say is that intensive rainfall in the previous days (high ARI) may not have propagated deep enough into the soil (high rzmc) for a positive prediction resp. alarm based on rainfall&rzmc, and result in a missed alarm. We decided to shift the focus in the phrasing to the meaning of alarms based on ARI7, in accordance with a comment by reviewer #2 Clàudia Abancó: While the number of missed alarms is lower for PHELS based on rainfall&rzmc than for PHELS based on rainfall alone, it is even lower for PHELS based on ARI7. A possible reason for this can be that (intensive) antecedent rainfall prepares failure by progressively destabilizing the slope. (Lines 354-357)***

18) L334-345. Interesting, but I would think that with the same dataset a coarser resolution model would likely perform better, particularly for FPR and particularly for isolated landslides.

***FPR is defined as the ratio of false positives over all observed negatives, i.e. all noLSE in the reference data. Typically, noLSE are easier to predict because of e.g. absence of rain or very dry conditions and the amount of false positive predictions does not increase proportionally to the amount of sampled noLSE references. When moving from an LSE-noLSE sampling rate of 1:1 (PHELS) to 1:10000 (LHASA) the FPR is therefore by design much lower. We added this in the sentence: Due to the choice in threshold and the larger LSE-noLSE sampling ratio (see above) this FPR is by design much higher than those for LHASA predictions [...] (Lines 370-371)***

19) L346-348. Yes, the GLC is incomplete both spatially and temporally, see previous comment about Seattle-area landslides in January 2016. Are there areas where it is more or less complete that you could compare to assess this?

***This is a good question. We had expected the GLC to be rather complete in the US, as compared to other regions worldwide, but your example of the Seattle-area illustrates that this is not the case. For spatial and temporal completeness, one would probably have to turn to a local or regional inventory. The question remains, however, how***



*complete landslide inventories can be, in general. The discussion now includes a paragraph on landslide-inventory-induced uncertainty. (see first paragraph in reply to comment 1)*

20) L349. The discussion section would benefit from presenting the sources of uncertainty are not considered and which of those potentially could be included. You are able to consider the uncertainty in susceptibility and triggering conditions since they can be quantified. However, the uncertainty due to incomplete inventories in space and time is not considered and could only be done if there were appropriate data to support this. Conversely, could the framework integrate weather forecasts and incorporate uncertainty in those forecasts relative to triggering conditions identified with the MERRA2 data?

*We included a paragraph in the discussion on the effect of inventory-induced uncertainty on the one hand, and uncertainty that PHELS takes into account on the other hand (see first paragraph in reply to comment 1).*

P.S. The animation is a nice bonus of this paper.

*Thanks!*
